# Supplementary material for: Hollow bean-pod-like SiO2-supported-SnO2/C nanocomposites for durable lithium and sodium storage
Source: Royal Society of Chemistry journal article supplement (doi:10.1039/c6ta09381g), 2016-12-09
Supplement: c6ta09381g1.pdf [file c6ta09381g1.pdf]

## Supporting Information

### Hollow bean-pod-like SiO<sub>2</sub>-supported-SnO<sub>2</sub>/C nanocomposites for durable lithium and sodium storage

Linyu Yang,<sup>a,b</sup> Site Li,<sup>b\*</sup> Jun Liu,<sup>b\*</sup> Kunjie Zhu,<sup>b</sup> Sailin Liu,<sup>b</sup> Ming Lei<sup>c</sup>

<sup>a</sup> School of physics and technology, Xin Jiang University, Urumqi, Xinjiang 830000, China.

<sup>b</sup> School of Materials Science and Engineering, Central South University, Changsha, Hunan 410083, China. E-mail: liujun4982004@csu.edu.cn

<sup>c</sup> State Key Laboratory of Information Photonics and Optical Communications, Beijing University of Posts and Telecommunications, Beijing 100876, China

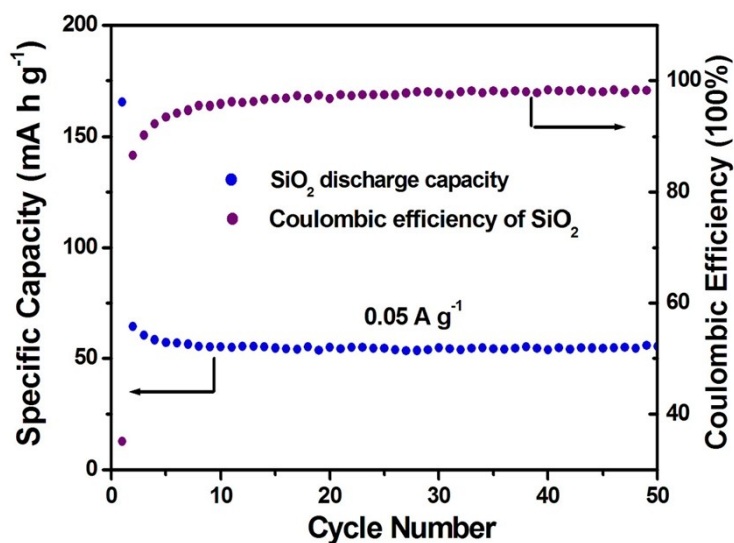

**Figure. S1** Cycling performance of SiO<sub>2</sub> at a current density of 50 mA g<sup>-1</sup> for Li storage.

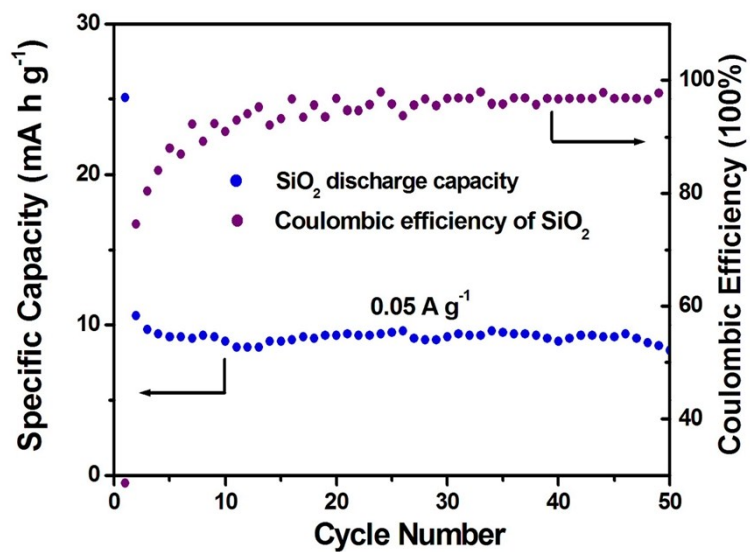

**Figure. S2** Cycling performance of SiO<sub>2</sub> at a current density of 50 mA g<sup>-1</sup> for Na storage.

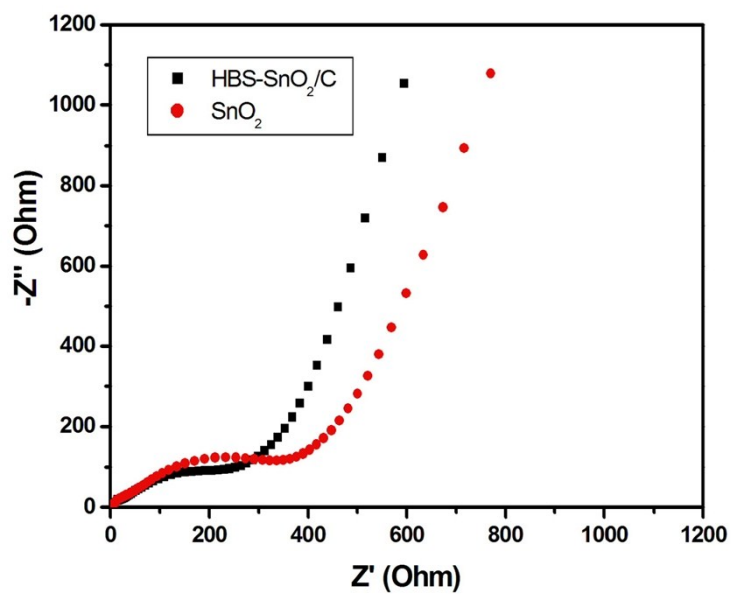

**Figure S3.** Experimental Nyquist plots of SnO<sub>2</sub> and HBS-SnO<sub>2</sub>/C nanocomposites for Li half cells.

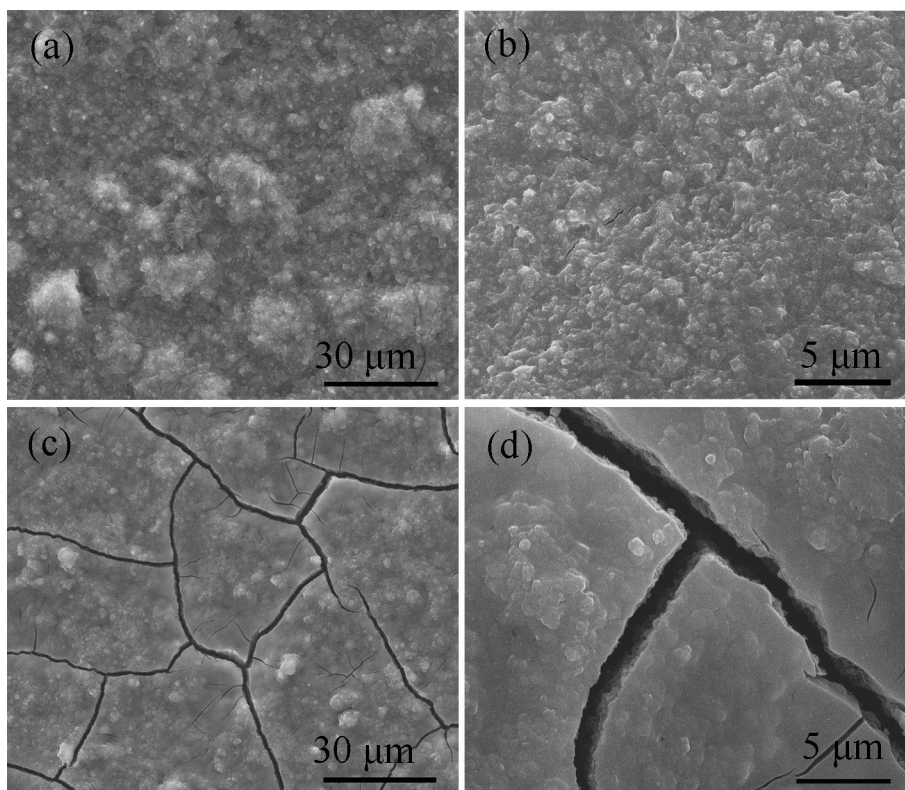

**Figure. S4** Analysis of electrodes after cycles: (a) and (b) SEM and magnified SEM images of HBS-SnO<sub>2</sub>/C electrodes after 50 cycles of the Li insertion and extraction. (c), (d) SEM and magnified SEM images of SnO<sub>2</sub> after 50 cycles of the Li insertion and extraction.

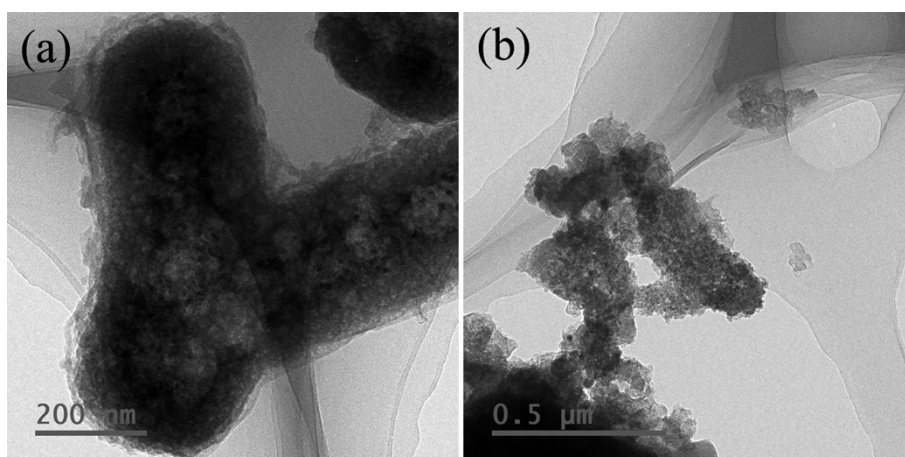

**Figure. S5** TEM images of (a) HBS-SnO<sub>2</sub>/C and (b) SnO<sub>2</sub> nanotubes after 50 cycles of the Li insertion and extraction.

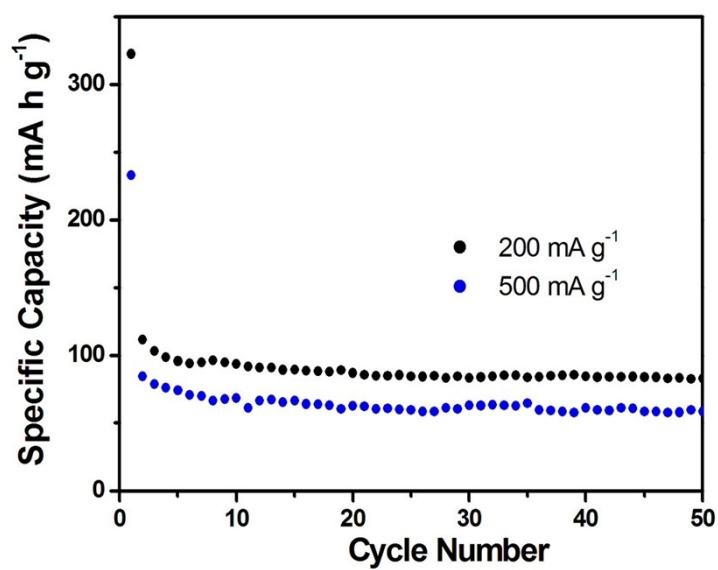

**Figure. S6** Cycling performance of HBS-SnO<sub>2</sub>/C nanocomposites at a current density of 200 and 500 mA g<sup>-1</sup>.

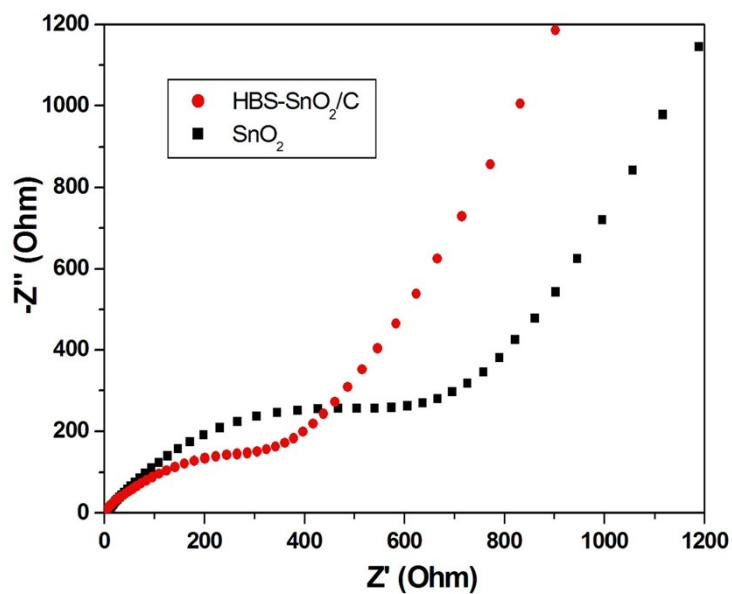

**Figure. S7** Experimental Nyquist plots of SnO<sub>2</sub> and HBS-SnO<sub>2</sub>/C nanocomposites for Na half cells.

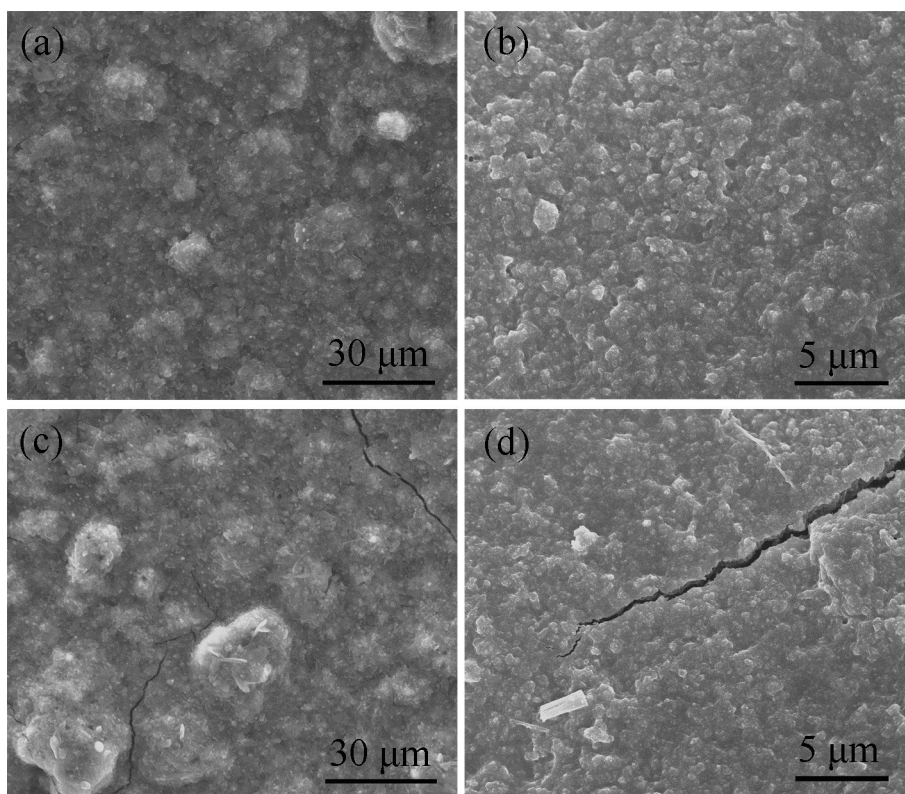

**Figure. S8** Analysis of electrodes after cycles: (a) and (b) SEM and magnified SEM images of HBS-SnO<sub>2</sub>/C electrodes after 50 cycles of the Na insertion and extraction. (c), (d) SEM and magnified SEM images of SnO<sub>2</sub> after 50 cycles of the Na insertion and extraction.

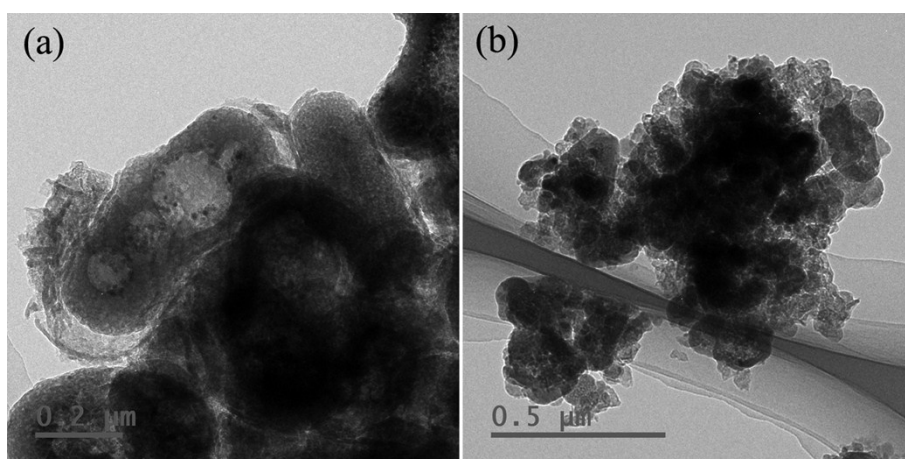

**Figure. S9** TEM images of (a) HBS-SnO<sub>2</sub>/C and (b) SnO<sub>2</sub> nanotubes after 50 cycles of the Na insertion and extraction.
